# Supplementary material for: Immune response plays a role in Mycoplasma pneumoniae pneumonia
Source: PubMed Central journal article supplement (PMC10250694; doi:10.3389/fimmu.2023.1189647), 2023-05-26
Supplement: DataSheet_1.pdf [file DataSheet_1.pdf]

Supplementary Materials for

**Immune Response Plays a Role in *Mycoplasma pneumoniae***

**pneumonia**

Yifan Zhu *et al.*

Corresponding author. Email: zhaodeyu.98@126.com(Deyu Zhao);  
guoyun@njmu.edu.cn (Yun Guo);axsliu@163.com(Feng Liu).

**This PDF file includes:**

Supplementary Figures 1 to 2  
Supplementary Tables 1 to 5

## Supplementary Figure 1

A

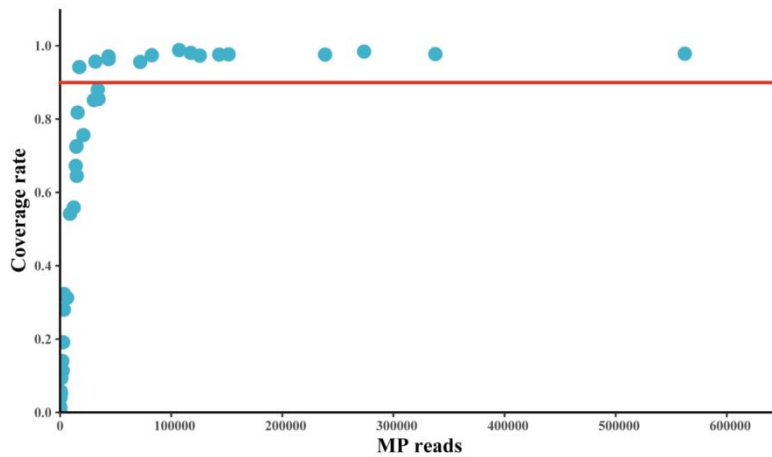

B

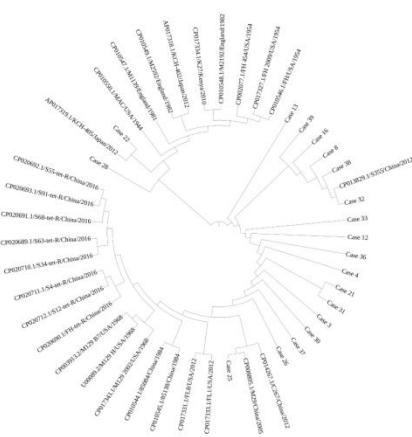

C

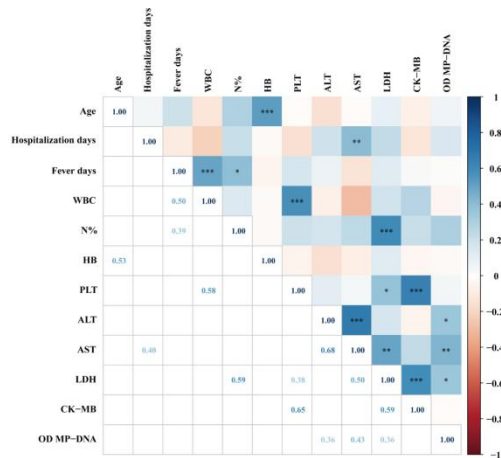

## Supplementary Figure 1

(A) Scattergram of correlation analysis between MP sequence numbers and coverage rate in the SD group. The MP strains in samples whose coverage rates were greater than 0.90 were selected to draw the evolutionary tree.

(B) The evolutionary tree of MP strains. MEGA7.0 was used to conduct alignment analysis of the selected MP strain sequences and reference strain sequences and complete the drawing of the evolutionary tree. SNP analysis was performed by Neighbor-Joining Algorithm.

(C) Correlation analysis of MP reads in the OD group with clinical data. Pearson correlation coefficient was obtained by R. The color represents the size of the correlation coefficient. A *t*-test was used to test the correlation coefficient. When  $p < 0.05$ , the correlation coefficient was marked in the square of the lower left triangle, and a “\*” was marked in the square of the upper right triangle; \*\*\*  $p < 0.001$ , \*\*  $0.001 \leq p < 0.01$ , and \*  $0.01 \leq p < 0.05$ .

## Supplementary Figure 2

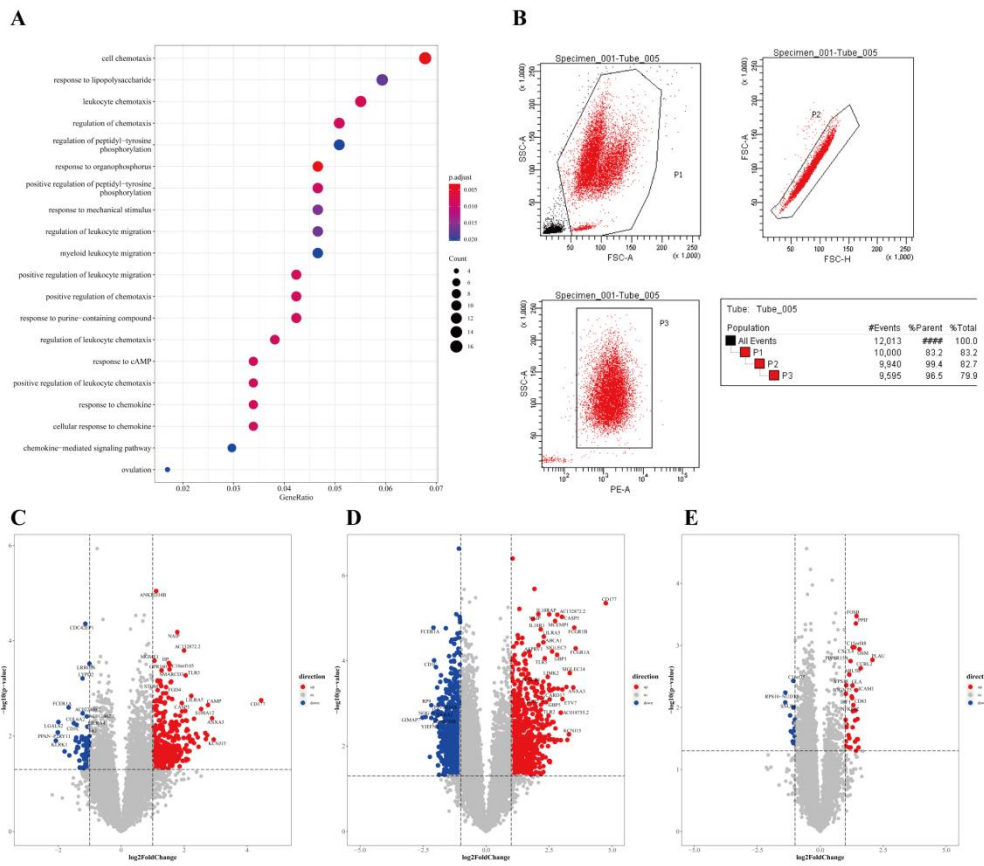

## Supplementary Figure 2

(A) SD vs. OD DEG GO\_BP dot plot. The dot plot was obtained from the GO enrichment analysis of all DEGs and shows the biological processes of them. The horizontal axis represents the proportion of genes associated with this function in DEGs. The longitudinal coordinate represents the relevant function. The smaller the adjusted p value, the more significant the enrichment. The size of the circle indicates the number of genes enriched to this function.

(B) Verification of the purity of the extracted neutrophils. The purity of the extracted neutrophils was determined by flow cytometry. The result was 96.5%.

(C) Volcano map of differentially expressed genes between the mild MPP group and normal group.

(D) Volcano map of differentially expressed genes between the severe MPP group and normal group.

(E) Volcano map of differentially expressed genes between the severe MPP group and mild MPP group.

**Supplementary Table 1 Functional gene set.**

| Gene set                 | Gene/GO number                                                                                                                                                 |
|--------------------------|----------------------------------------------------------------------------------------------------------------------------------------------------------------|
| NETs                     | ACTB, ACTG1, ACTN1, ACTN4, AZU1,<br>CAT, CTSG, DEFA3, ELANE, ENO1, KRT10,<br>LCPI, LTF, LYZ, MNDA, MPO, MYH9,<br>PADI4, PRTN3, S100A12, S100A8,<br>S100A9, TKT |
| NADPH oxidase            | Cybb, Cyba, Rac2,RAC1, Ncf2, Ncf1,Ncf4                                                                                                                         |
| neutrophil activation    | GO:0042119                                                                                                                                                     |
| neutrophil chemotaxis    | GO:0030593                                                                                                                                                     |
| neutrophil degranulation | GO:0043312                                                                                                                                                     |
| Phagocytosis             | GO:0006911                                                                                                                                                     |
| ROS production           | GO:1903409                                                                                                                                                     |

The following 5 gene sets could be obtained by inputting their numbers on the Gene Ontology.

**Supplementary Table 2 Comparison of the top 10 microorganisms in relative abundance between the SD group and OD group at the genus level.**

| Genus                 | P value |
|-----------------------|---------|
| <i>Mycoplasma</i>     | 0.18    |
| <i>Streptococcus</i>  | 0.59    |
| <i>Prevotella</i>     | 0.48    |
| <i>Carnobacterium</i> | 0.82    |
| <i>Veillonella</i>    | 0.45    |
| <i>Rothia</i>         | 0.96    |
| <i>Acinetobacter</i>  | 0.17    |
| <i>Citrobacter</i>    | 0.05    |
| <i>Actinomyces</i>    | 0.25    |
| <i>Ralstonia</i>      | 0.56    |

The P values were obtained by a Wilcoxon-Mann-Whitney rank-sum test. A P value less than 0.05 was considered to be statistically significant.

**Supplementary Table 3 Comparison of the top 10 microorganisms in relative abundance between the SD group and OD group at the species level.**

| Species                              | P value |
|--------------------------------------|---------|
| <i>Mycoplasma_pneumoniae</i>         | 0.15    |
| <i>Prevotella_melaninogenica</i>     | 0.49    |
| <i>Carnobacterium_maltaromaticum</i> | 0.67    |
| <i>Streptococcus_salivarius</i>      | 0.76    |
| <i>Streptococcus_parasanguinis</i>   | 0.72    |
| <i>Rothia_mucilaginosa</i>           | 0.98    |
| <i>Streptococcus_mitis</i>           | 0.85    |
| <i>Veillonella_atypica</i>           | 0.71    |
| <i>Porphyromonas_somerae</i>         | 0.90    |
| <i>Prevotella_pallens</i>            | 0.37    |

The P values were obtained by a Wilcoxon-Mann-Whitney rank-sum test. A P value less than 0.05 was considered to be statistically significant.

**Supplementary Table 4 Comparison of immune-related differentially expressed genes between the SD group and OD group.**

| Immune-related differentially expressed genes | SD vs. OD | P value |
|-----------------------------------------------|-----------|---------|
| CCL3L1                                        | Rise      | 0.035   |
| CCR1                                          | Rise      | 0.006   |
| CCR3                                          | Rise      | 0.022   |
| CX3CL1                                        | Reduce    | 0.039   |
| CXCL1                                         | Rise      | 0.0072  |
| CXCL2                                         | Rise      | 0.00021 |
| CXCL8                                         | Rise      | 8.8e-05 |
| CXCL12                                        | Rise      | 0.00044 |
| CXCR1                                         | Rise      | 0.008   |
| CXCR2                                         | Rise      | 0.004   |
| CXCR4                                         | Rise      | 6.5e-05 |
| XCR1                                          | Rise      | 0.0088  |
| IL1A                                          | Rise      | 0.0074  |
| IL1B                                          | Rise      | 0.011   |
| IL1R1                                         | Rise      | 0.014   |
| IL1R2                                         | Rise      | 0.0092  |
| IL1RN                                         | Rise      | 0.0071  |
| IL2RG                                         | Rise      | 0.00062 |
| IL6                                           | Rise      | 0.0031  |
| IL6R                                          | Rise      | 0.028   |
| IL6ST                                         | Rise      | 0.047   |
| IL10RB                                        | Rise      | 0.0053  |
| IL36G                                         | Rise      | 0.0051  |
| IL36RN                                        | Rise      | 0.0026  |
| TNFRSF1A                                      | Rise      | 0.033   |
| TNFRSF1B                                      | Rise      | 0.0013  |
| TNFRSF8                                       | Rise      | 0.0014  |
| TNFRSF9                                       | Rise      | 0.0073  |
| TNFRSF10C                                     | Rise      | 0.0094  |
| TNFRSF17                                      | Rise      | 0.047   |
| TNFSF8                                        | Rise      | 1.9e-05 |
| TNFSF14                                       | Rise      | 0.00074 |
| TNFSF15                                       | Rise      | 0.0062  |
| IFNA5                                         | Reduce    | 0.023   |
| IFNAR1                                        | Rise      | 0.0046  |
| IFNGR1                                        | Rise      | 0.0019  |
| IFNGR2                                        | Rise      | 0.02    |
| IFNLR1                                        | Reduce    | 0.021   |
| TGFB1                                         | Rise      | 0.0084  |
| TGFBR1                                        | Rise      | 0.015   |

|        |      |         |
|--------|------|---------|
| CSF2RB | Rise | 0.041   |
| CSF3R  | Rise | 0.0042  |
| CMTM6  | Rise | 0.0023  |
| FAS    | Rise | 0.021   |
| LTA    | Rise | 0.0017  |
| OSM    | Rise | 0.0017  |
| SPP1   | Rise | 0.00058 |

The P values were obtained by a Wilcoxon-Mann-Whitney rank-sum test. A P value less than 0.05 was considered to be statistically significant.

**Supplementary Table 5 Demographic and clinical characteristics of children included in transcriptome sequencing test.**

|                  |                                    | Normal<br>(n = 6) | Mild MPP<br>(n = 6)  | Severe MPP<br>(n = 6)   |
|------------------|------------------------------------|-------------------|----------------------|-------------------------|
| Sex              | Male                               | 4 (66.6%)         | 2 (33.3%)            | 3 (50%)                 |
|                  | Age                                | 4.86 ± 1.88       | 4.40 ± 2.04          | 7.74 ± 3.02             |
|                  | WBC (× 10 <sup>9</sup> /L)         | 7.23 ± 0.70       | 9.42 ± 4.18          | 8.30 ± 2.86             |
|                  | Neutrophils (× 10 <sup>9</sup> /L) | 2.12 ± 0.63       | 5.80 ± 3.32          | 5.99 ± 2.58             |
| CRP (mg/L)       | <10                                | 6 (100%)          | 2 (33.3%)            | 3 (50%)                 |
|                  | ≥10                                | 0                 | 15.00 (11.00, 23.85) | 30.00, 64,98.2          |
|                  | HB (g/L)                           | 123.16 ± 7.65     | 126.00 ± 6.32        | 127.17 ± 13.81          |
|                  | PLT (× 10 <sup>9</sup> /L)         | 243.17 ± 92.86    | 304.67 ± 200.95      | 274.67 ± 166.67         |
|                  | ALT (U/L)                          | 12.33 ± 4.13      | 8.67 ± 2.73          | 14.67 ± 10.39           |
|                  | AST (U/L)                          | 26.50 ± 2.59      | 23.33 ± 8.55         | 36.17 ± 18.68           |
|                  | LDH (U/L)                          | 259.50 ± 15.49    | 352.33 ± 79.42       | 382.50 (331.00, 711.25) |
|                  | CK-MB (U/L)                        | 23.33 ± 4.18      | 23.00 ± 9.42         | 20.00 (11.50, 35.25)    |
| Pleural reaction | Yes                                | /                 | 0                    | 2 (33.3%)               |
| Pleural effusion | Yes                                | /                 | 0                    | 2 (33.3%)               |
| Atelectasis      | Yes                                | /                 | 0                    | 1 (16.7%)               |

Quantitative normal or nearly normal data are expressed as the mean ± standard deviation and analyzed by the t-test. Quantitative skewness data are presented as the median (percentile: P25, P75) and analyzed by the Wilcoxon-Mann-Whitney rank-sum test. Categorical data are expressed as the frequency and analyzed by the chi-square test. WBC: white blood cell; CRP: C-reactive protein; HB: hemoglobin; PLT: platelet; ALT: alanine aminotransferase; AST: aspartate aminotransferase; LDH: lactate dehydrogenase; CK-MB: creatine kinase-MB.
